# Supplementary material for: EasyLabels: weak labels for scene segmentation in laparoscopic videos
Source: Springer Nature journal article supplement (doi:10.1007/s11548-019-02003-2), 2019-06-04
Supplement: 11548_2019_2003_MOESM3_ESM.pdf [file 11548_2019_2003_MOESM3_ESM.pdf]

The following supplementary material has been included:

- 2 videos showing the segmentation for the Bypass dataset, one with all the validation instances (full\_video.mp4) and another reduced (full\_video\_sub.mp4). These videos show side to side the original image, the segmentation results with full supervision and the segmentation results with weak supervision.

The color code is the following

| RGB code        | Color   | Class              |
|-----------------|---------|--------------------|
| [0, 0, 0]       | black   | background         |
| [255, 0, 0]     | red     | automatic grasper  |
| [0, 255, 0]     | lime    | bowel clamp        |
| [0, 0, 255]     | blue    | clip applicator    |
| [255, 255, 0]   | yellow  | drain              |
| [0, 255, 255]   | cyan    | harmonic scalpel   |
| [255, 0, 255]   | magenta | hook               |
| [192, 192, 192] | silver  | ligasure           |
| [96, 96, 96]    | gray    | liver retractor    |
| [128, 0, 0]     | maroon  | needle holder      |
| [128, 128, 0]   | olive   | o reilly           |
| [0, 128, 0]     | green   | scissors           |
| [128, 0, 128]   | purple  | stapler            |
| [0, 128, 128]   | teal    | suction irrigation |
| [255, 255, 255] | white   | ignore label       |

We also include the confusion matrices for all the experiments performed.

For Endovis 15:

Example:

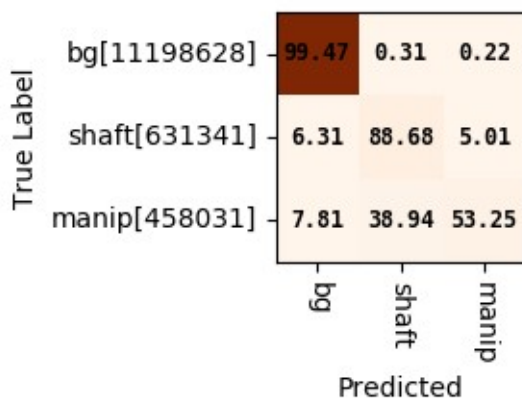

Numbers in y-axis show the number of pixels belonging to each label.

List of confusion matrices:

endovis\_15\_fullsup\_fold0.png  
endovis\_15\_fullsup\_fold1.png  
endovis\_15\_fullsup\_fold2.png  
endovis\_15\_fullsup\_fold3.png  
endovis\_15\_fullsup\_fold4.png  
endovis\_15\_weaksup\_auto\_fold0.png  
endovis\_15\_weaksup\_auto\_fold1.png  
endovis\_15\_weaksup\_auto\_fold2.png  
endovis\_15\_weaksup\_auto\_fold3.png  
endovis\_15\_weaksup\_auto\_fold4.png  
endovis\_15\_weaksup\_human\_lines\_fold0.png  
endovis\_15\_weaksup\_human\_lines\_fold1.png  
endovis\_15\_weaksup\_human\_lines\_fold2.png  
endovis\_15\_weaksup\_human\_lines\_fold3.png  
endovis\_15\_weaksup\_human\_lines\_fold4.png  
endovis\_15\_weaksup\_human\_moreLines\_fold0.png  
endovis\_15\_weaksup\_human\_moreLines\_fold1.png  
endovis\_15\_weaksup\_human\_moreLines\_fold2.png  
endovis\_15\_weaksup\_human\_moreLines\_fold3.png  
endovis\_15\_weaksup\_human\_moreLines\_fold4.png

For LapSleeve:

lapsleeve\_fullsup\_fold0.png  
lapsleeve\_fullsup\_fold1.png  
lapsleeve\_fullsup\_fold2.png  
lapsleeve\_fullsup\_fold3.png  
lapsleeve\_fullsup\_fold4.png  
lapsleeve\_weaksup\_fold0.png  
lapsleeve\_weaksup\_fold1.png  
lapsleeve\_weaksup\_fold2.png  
lapsleeve\_weaksup\_fold3.png  
lapsleeve\_weaksup\_fold4.png
